# Supplementary material for: SWIR emissive RosIndolizine dyes with nanoencapsulation in water soluble dendrimers
Source: Royal Society of Chemistry journal article supplement (doi:10.1039/d1ra05479a), 2021-01-01
Supplement: d1ra05479a2.pdf [file d1ra05479a2.pdf]

# Synthesis, Characterization, and Nanoencapsulation of RosIndolizine-based Fluorescent Probes

RSC  
Advances

Fluorescence imaging in the shortwave infrared (SWIR) spectral region has potential for biological applications

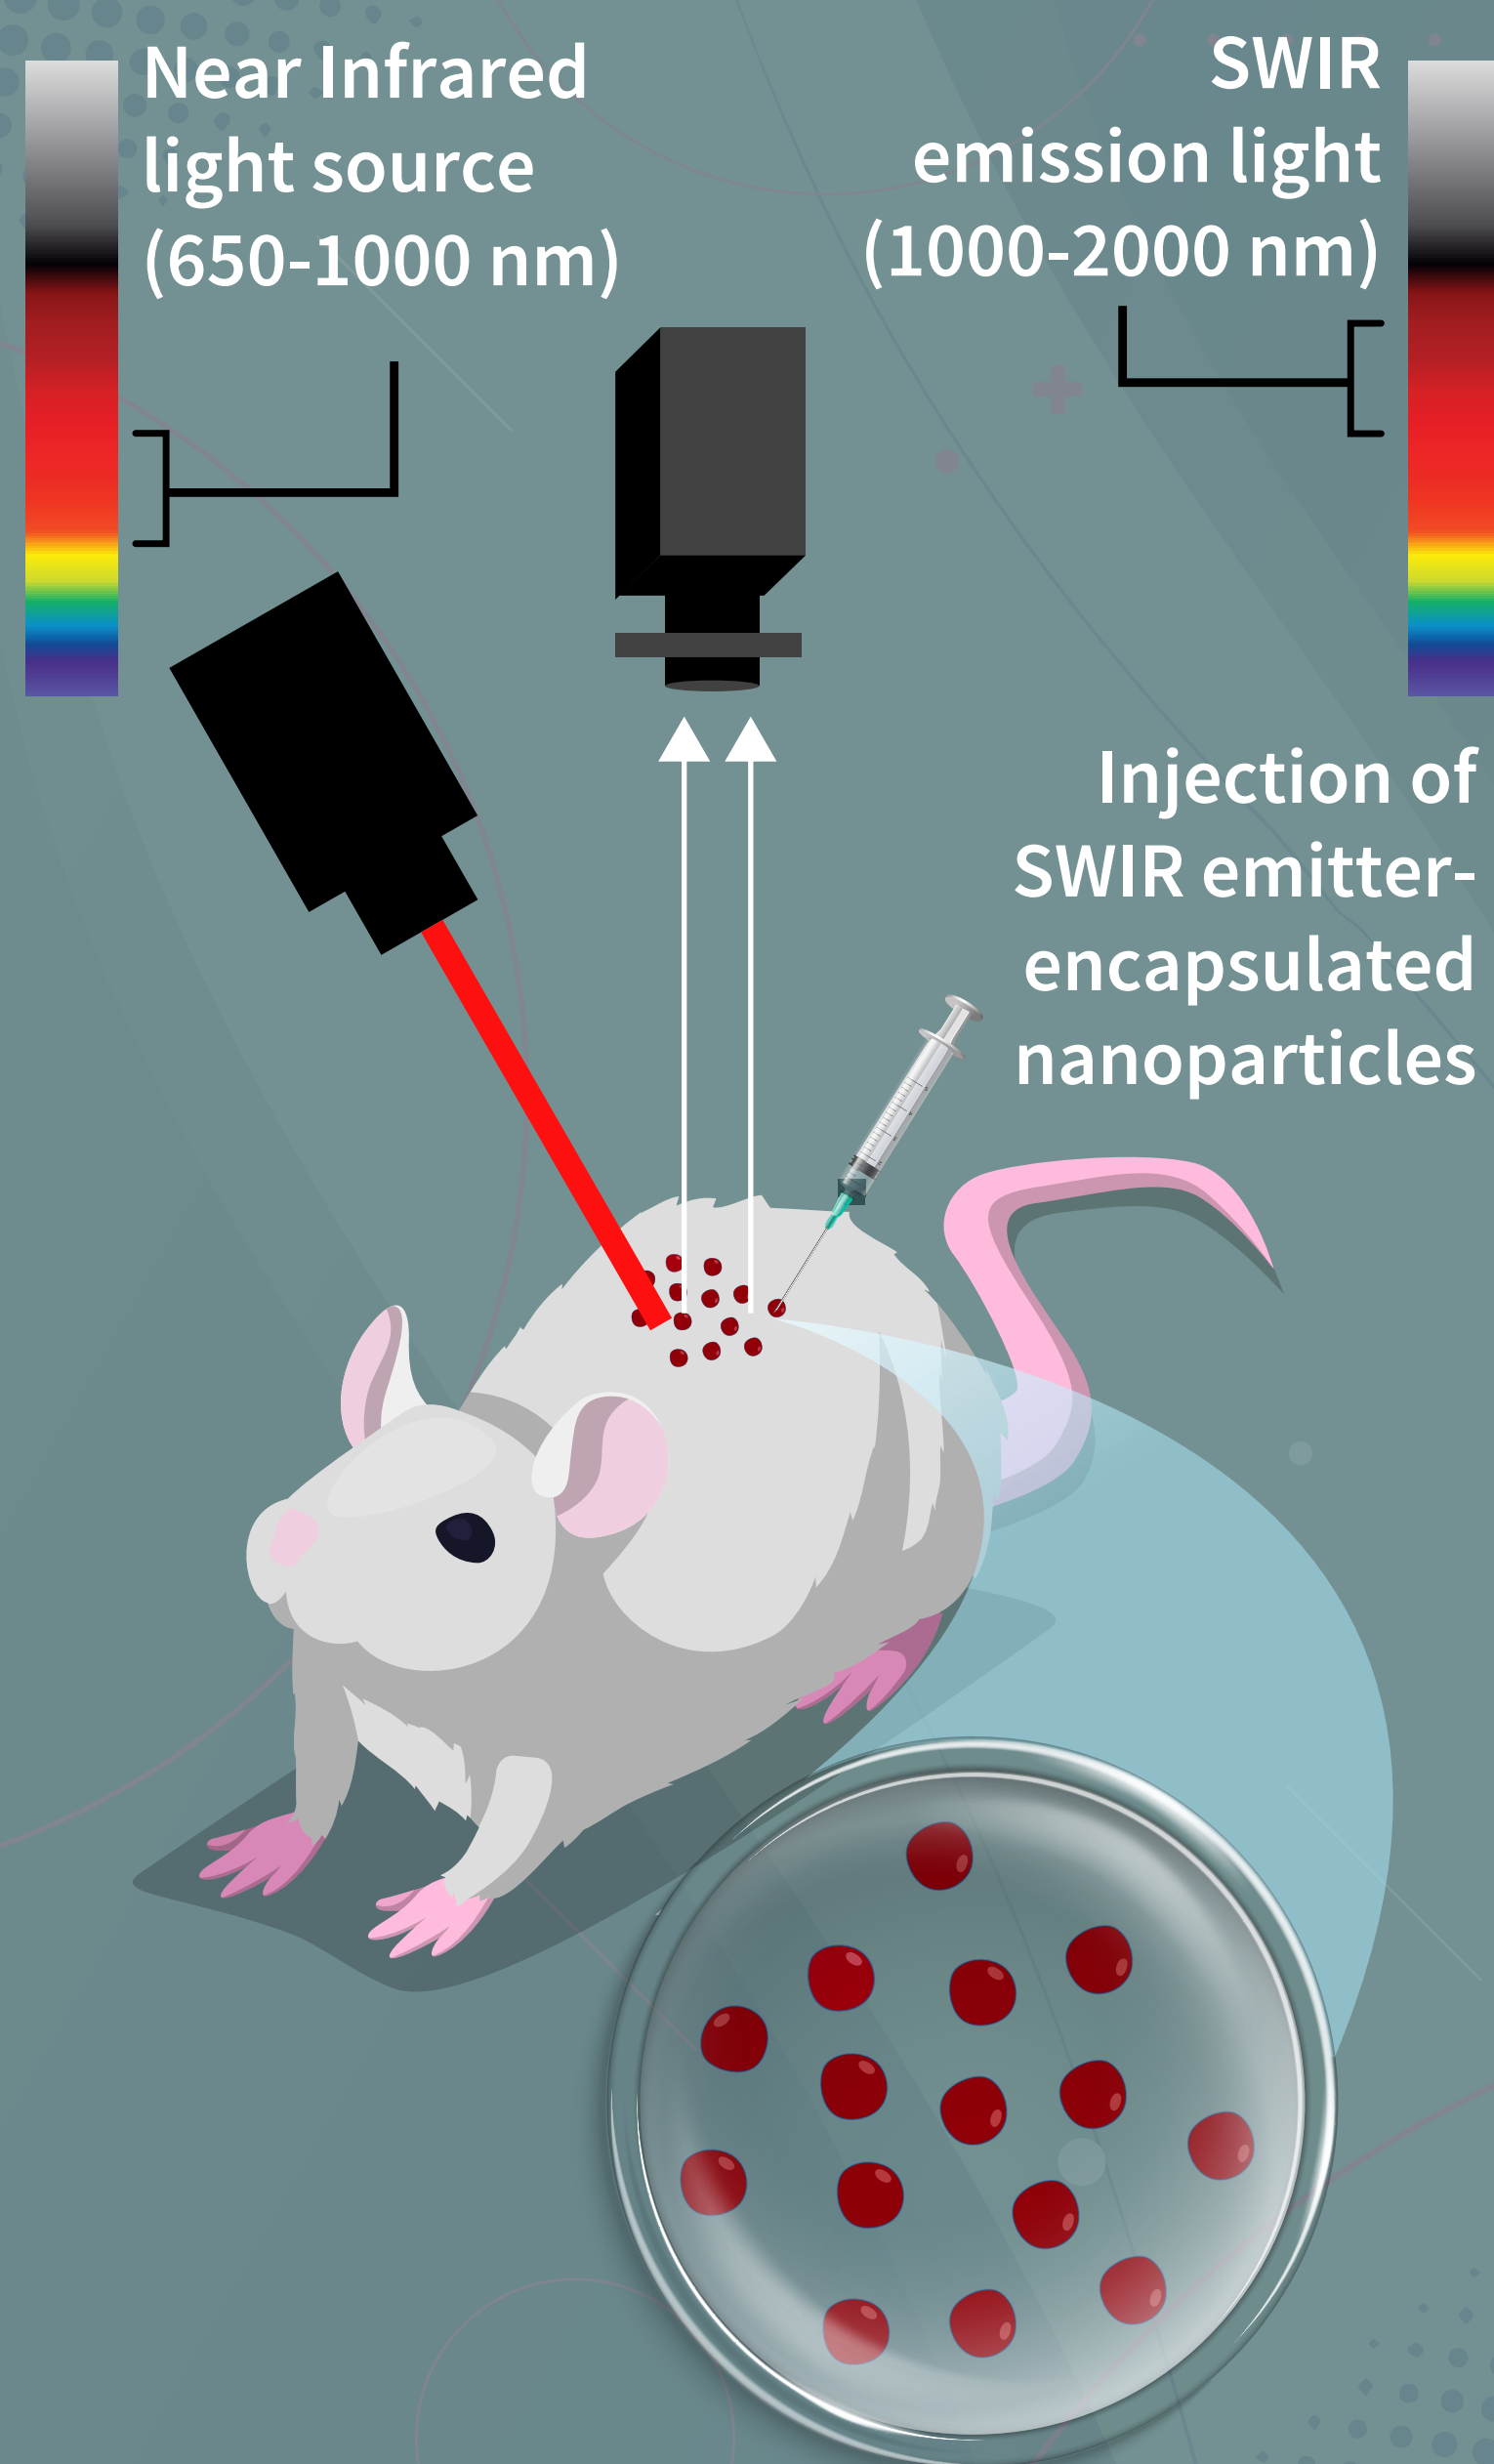

However, there is a paucity of fluorescent probes in the SWIR region

Can xanthene-based fluorescent dyes be synthesized and nanoencapsulated for SWIR-based bioimaging?

- ✓ The dyes, <sup>Ph</sup>RosIndz and <sup>tol</sup>RosIndz, were synthesized with 60 and 63% yields, respectively
- ✓ Both dyes (  $\lambda_{\text{max}}^{\text{em}}$  : 1097 nm) were stable and exhibited similar emission profiles
- ✓ High (>90%) cell viability and low toxicity observed for human embryonic kidney (HEK)-293 cells exposed to nanoparticle-encapsulated dyes

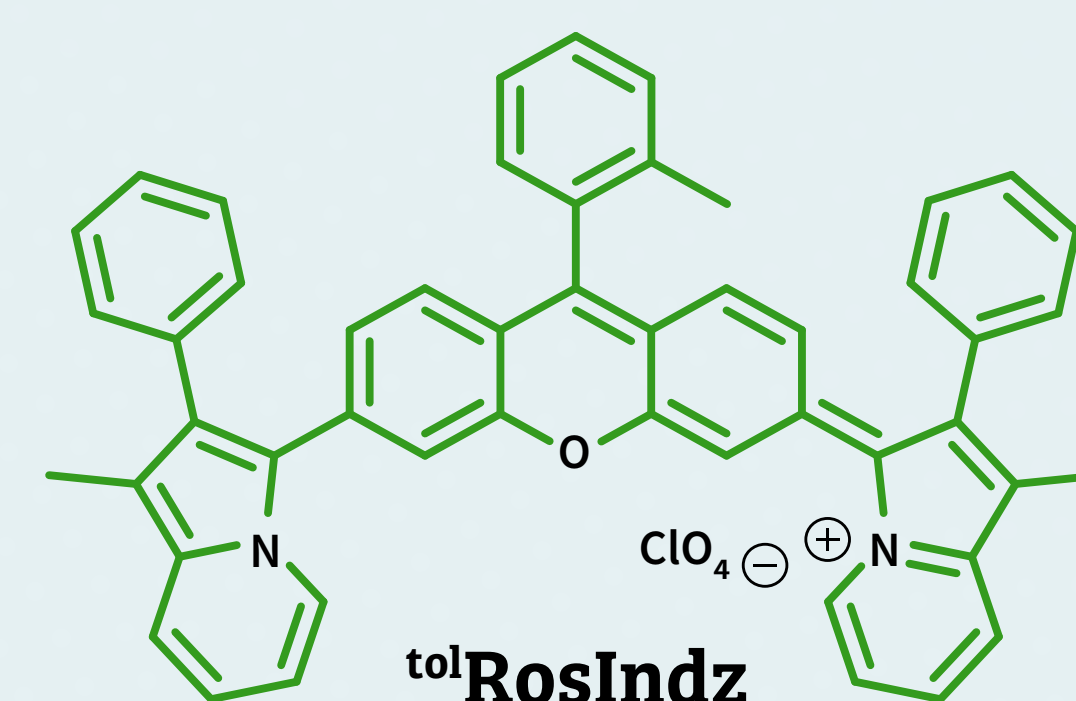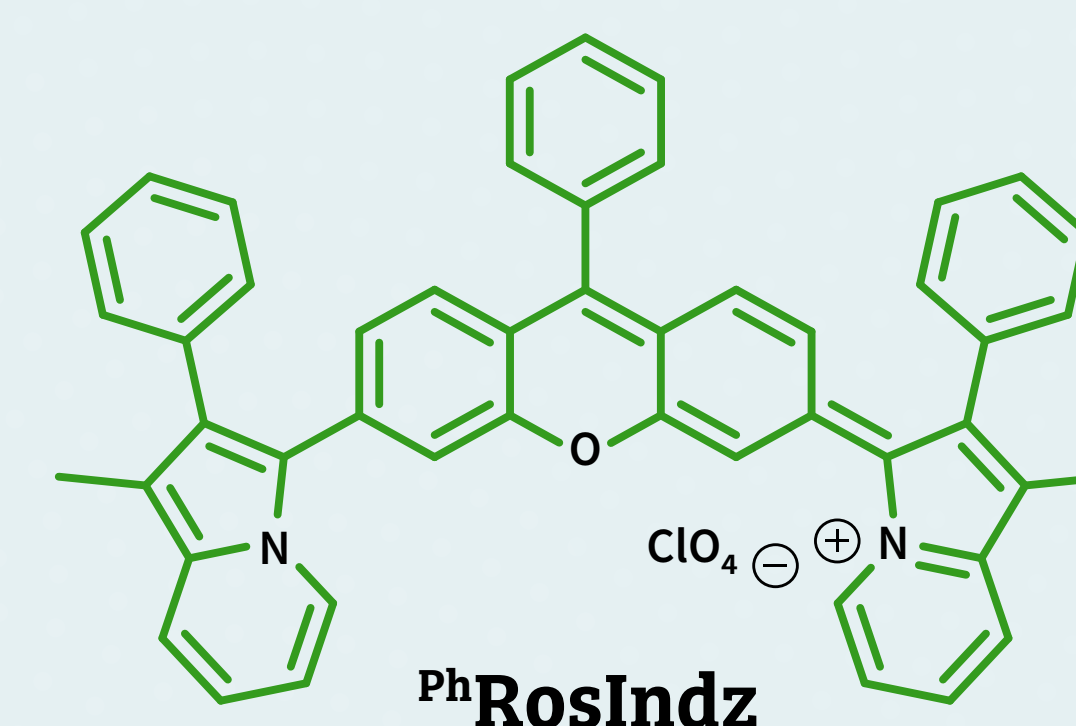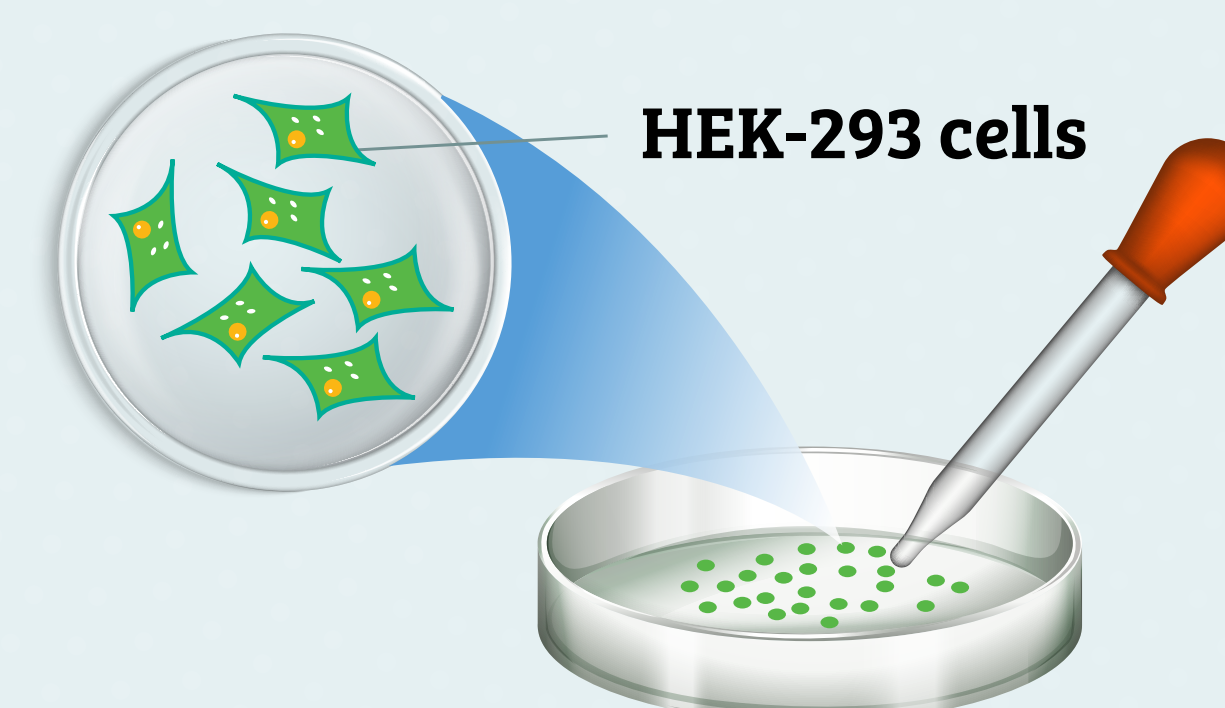

<sup>Ph</sup>RosIndz and <sup>tol</sup>RosIndz are biocompatible fluorescent probes with SWIR-based imaging applications
